# Supplementary material for: Starch synthase 4 is essential for coordination of starch granule formation with chloroplast division during Arabidopsis leaf expansion
Source: PubMed Central journal article supplement (PMC4283981; doi:10.1111/nph.12455), 2013-08-19
Supplement: nph0200-1064-SD1.pdf [file nph0200-1064-SD1.pdf]

## SUPPORTING INFORMATION

### **Starch synthase 4 is essential for coordination of starch granule initiation with chloroplast division during Arabidopsis leaf expansion**

Matilda Crumpton-Taylor<sup>1,\*</sup>, Marilyn Pike<sup>1,\*</sup>, Kuan-Jen Lu<sup>2</sup>, Christopher M. Hylton<sup>1</sup>, Regina Feil<sup>3</sup>, Simona Eicke<sup>2</sup>, John E. Lunn<sup>3</sup>, Samuel C. Zeeman<sup>2</sup> and Alison M. Smith<sup>1</sup>

<sup>1</sup>John Innes Centre, Norwich Research Park, Norwich NR4 7UH, UK; <sup>2</sup>Institute of Agricultural Sciences, Eidgenössische Hochschule Zürich, Universitätstr. 2, 8092 Zürich, Switzerland; <sup>3</sup>Max-Planck Institute of Molecular Plant Physiology, Wissenschaftspark Golm, Am Mühlenberg 1, 14476 Potsdam-Golm, Germany.

Author for correspondence: Alison M. Smith

Tel: +44 (0)1603 450622; Email: [alison.smith@jic.ac.uk](mailto:alison.smith@jic.ac.uk)

Table S1.

Oligonucleotide primers used in this study.

Primers used in the selection of *arc* mutants were as described in Crumpton-Taylor *et al.* (2012). Gene-specific sequences for Gateway® primers are in bold.

| Experiment                   | Oligonucleotide | Sequence                            |
|------------------------------|-----------------|-------------------------------------|
| <i>ss4</i> mutant            | SS4CDNA_F       | ATGACGACGAAGCTATCGAGC               |
| complementation              | SS4CDNA_R       | CGTGCGATTAGGAACAGCTC                |
| with <i>SS4</i> cDNA         | GFP_pK7_F       | CTGTTGTAGTTGTA <b>CTCCAGCTTGTGC</b> |
|                              | SALK096130_R    | GAATTTGCTTGGATGTTGAGG <b>TT</b> C   |
| Selection of                 | R1-4_F          | CGGAAGTAAAATCTTTTACAG               |
| <i>ss4sex1</i> mutant        | R1-17_R         | AAGGATTATGGCGATGGAAAGGGT            |
| SS4 RNAi:                    | SS4_P4_F        | GGATTGGCACTGTTGAAGGT                |
| pOpOff2(hyg)::S              | SS4_P4_R        | CCGGACTGAAGAAGCAACTC                |
| S4A                          |                 |                                     |
| SS4 RNAi:                    | SS4_P6_F        | TTGGAGCGAGCATTTAATCA                |
| pOpOff2(hyg)::S              | SS4_P6_R        | CTCACGTGCGATTAGGAACA                |
| S4B                          |                 |                                     |
| Expression of                | glgA_F          | GGGGACAAGTTTGTACAAAAAAGCAGGCTTG     |
| <i>glgA</i> in <i>ss3ss4</i> |                 | <b>ATGAATGTCCTTTCGGTTTCATC</b>      |
| pDONR221::                   | glgA_R          | GGGGACCACT TGTACAAGA AAGCTGGGTA     |
| <i>glgA</i>                  |                 | <b>TGGCCTTTCG AAATAAGCTG G</b>      |
| <i>TUBULIN</i> as            | TUB_F           | CCTGATAACTTCGTCTTTGG                |
| control in RNAi              | TUB_R           | GTGAACTCCATCTCGTCCAT                |
| experiment                   |                 |                                     |

Table S2.

Starch synthase activities and chlorophyll contents of *ss4* mutants.

Measurements were made on mature, non-flowering rosettes. Starch synthase activity was measured on freshly prepared leaf extracts by a modification of the resin method of Jenner *et al.* (1994).

Values are means  $\pm$  SE of measurements on five rosettes for each genotype.

| Genotype     | Soluble starch synthase activity ( $\mu\text{mol min}^{-1} \text{g}^{-1}$ fresh weight) | Chlorophyll content ( $\text{mg g}^{-1}$ fresh weight) | Chlorophyll a:chlorophyll b ratio |
|--------------|-----------------------------------------------------------------------------------------|--------------------------------------------------------|-----------------------------------|
| <i>ss4-1</i> | $0.128 \pm 0.006$                                                                       | $0.66 \pm 0.02$                                        | $2.80 \pm 0.03$                   |
| <i>ss4-3</i> | $0.140 \pm 0.006$                                                                       | $0.64 \pm 0.02$                                        | $2.85 \pm 0.08$                   |
| Wild-type    | $0.181 \pm 0.007$                                                                       | $1.09 \pm 0.06$                                        | $2.84 \pm 0.04$                   |

Table S3.

ADPglucose contents of mature and immature leaves of *ss4* mutants.

ADPglucose contents of two different *ss4* T-DNA insertion mutants, and of mature and young leaves from the same, mature, non-flowering rosettes. Values are means  $\pm$  SD of measurements on five plants for each genotype for the batch of plants in the upper part of the Table, and for five plants per genotype for the separately-grown batch of plants in the lower part of the Table.

| Genotype/tissue                | ADPglucose content<br>(nmol g <sup>-1</sup> fresh weight) |
|--------------------------------|-----------------------------------------------------------|
| <i>ss4-1</i> rosette           | 42.4 $\pm$ 10.9                                           |
| <i>ss4-3</i> rosette           | 43.6 $\pm$ 3.9                                            |
| Wild-type rosette              | 0.58 $\pm$ 0.41                                           |
| <i>ss4-3</i> , immature leaves | 30.5 $\pm$ 11.2                                           |
| <i>ss4-3</i> , mature leaves   | 26.2 $\pm$ 12.5                                           |
| Wild-type, immature leaves     | 0.14 $\pm$ 0.10                                           |
| Wild-type, mature leaves       | 0.13 $\pm$ 0.08                                           |

Figure S1

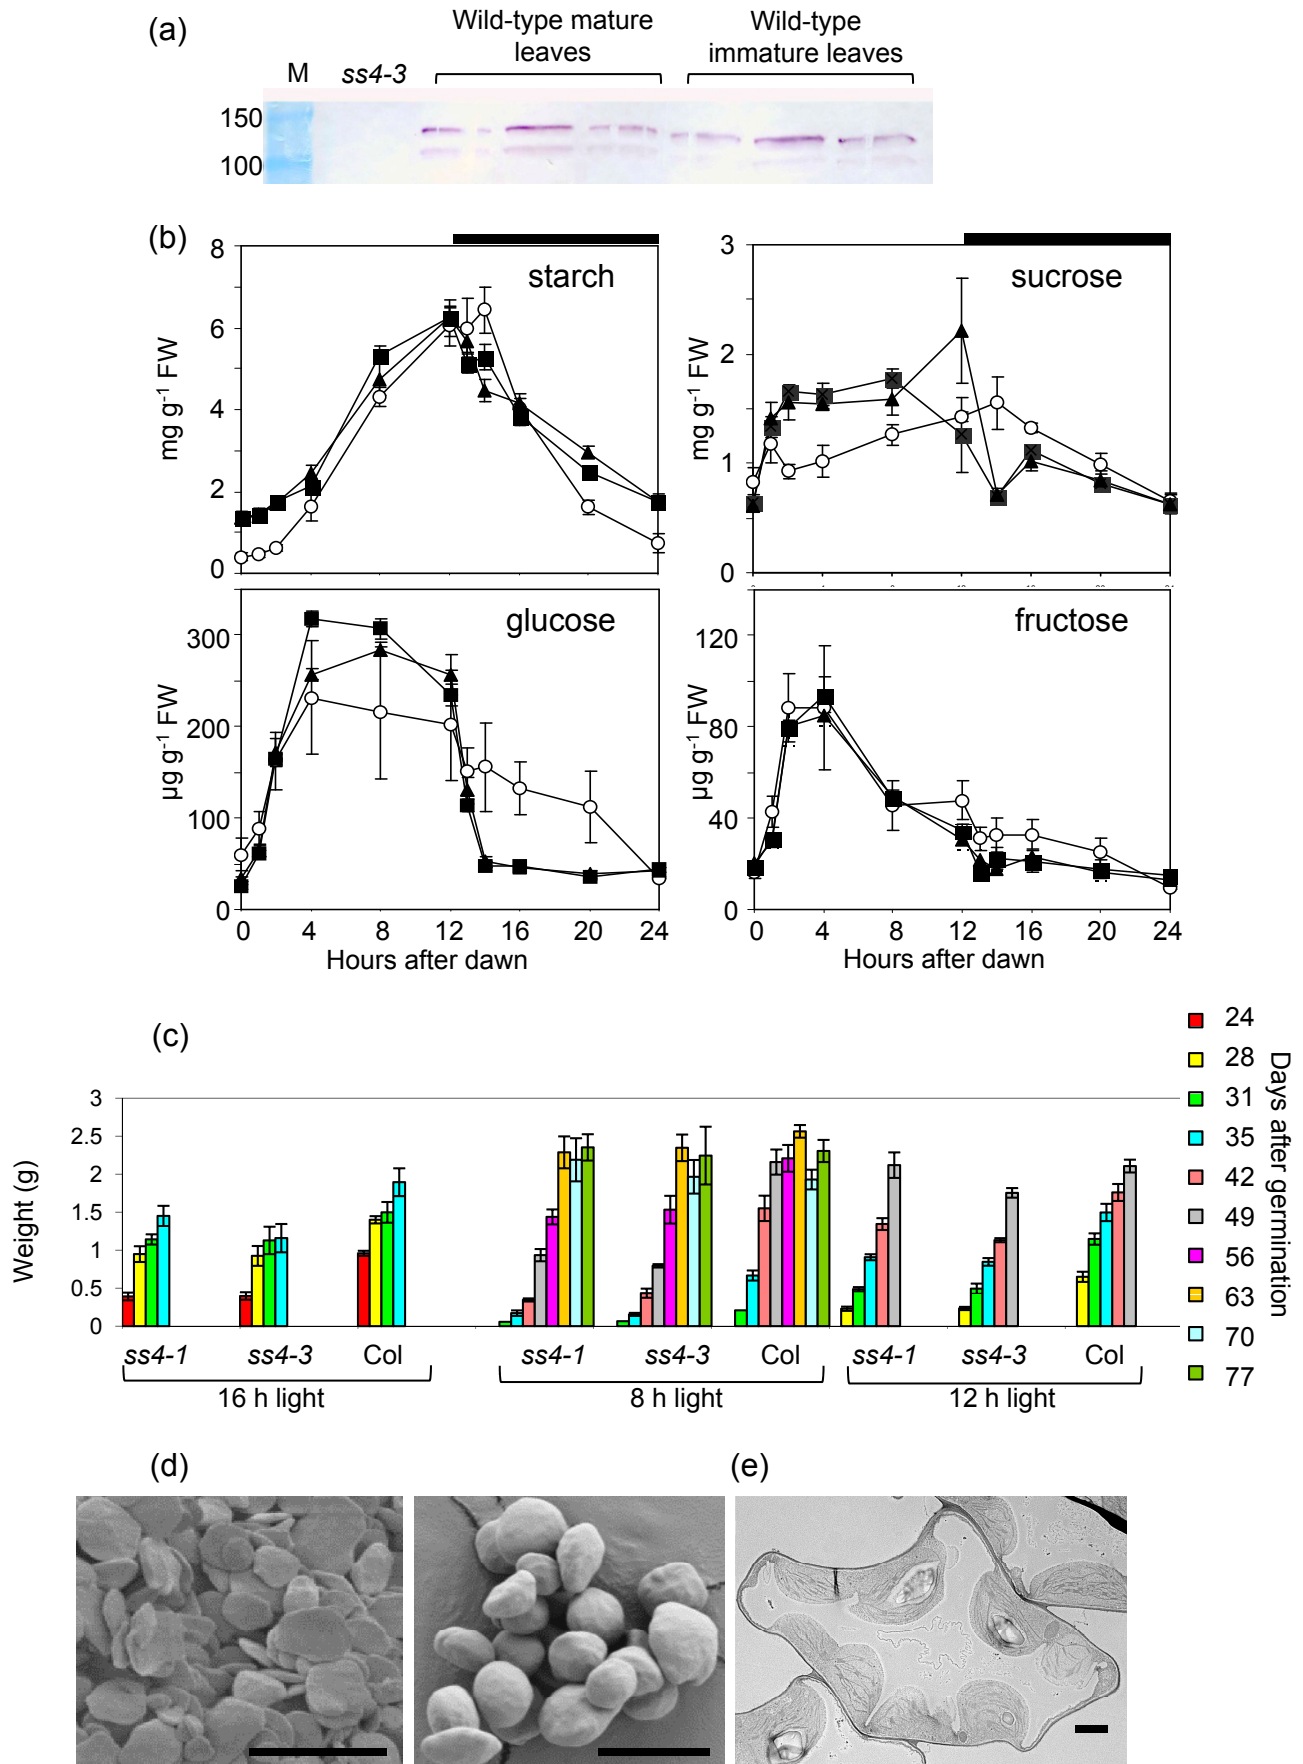

**Fig. S1** Characterization of *ss4* mutants. (a) Immunoblot of an SDS-polyacrylamide gel of *ss4-3* mutant leaves and mature and young leaves of wild-type plants. M is molecular mass markers, masses indicated in kDa. Each of the remaining lanes contains 40  $\mu$ l extract from a separate plant. All extracts contained the same mg tissue per ml extraction medium. Equal loadings were confirmed by SDS-PAGE followed by Coomassie InstantBlue<sup>TM</sup> staining of the same extracts (not shown). The blot was probed with purified SS4 antibodies, raised against a unique 14-amino-acid peptide. (b) Changes in starch, sucrose glucose and fructose over 24 h in mature, non-flowering rosettes grown under 12 h light, 12 h dark (darkness from 12 to 24 h after dawn). Values are means of measurements on six rosettes, bars are SE. Open circles, wild-type (Col). Filled triangles, *ss4-1*. Filled squares, *ss4-3*. (c) Fresh weights of rosettes of wild-type (Col) and *ss4* mutant plants grown in three different light regimes and harvested at the time points indicated. Light was 230, 148 and 136  $\mu$ mol quanta  $m^{-2} s^{-1}$  in 16 h, 12 h and 8 h light periods respectively. In the 16-h light period all genotypes flowered at 24 d. In the 12-h light period Col flowered at 35 d and *ss4* mutants flowered at 42 d. In the 8-h light period Col flowered at 56 d and *ss4* mutants at 77 d. Data are means of measurements on five rosettes, error bars are SE. (d) Scanning electron micrographs of starch granules from wild-type (left) and *ss4* (right) rosettes harvested at the end of the light period. Bar represents 5  $\mu$ m. (e) Transmission electron micrograph of a mesophyll cell in a mature leaf of a *ss4* rosette. Bar represents 2  $\mu$ m.

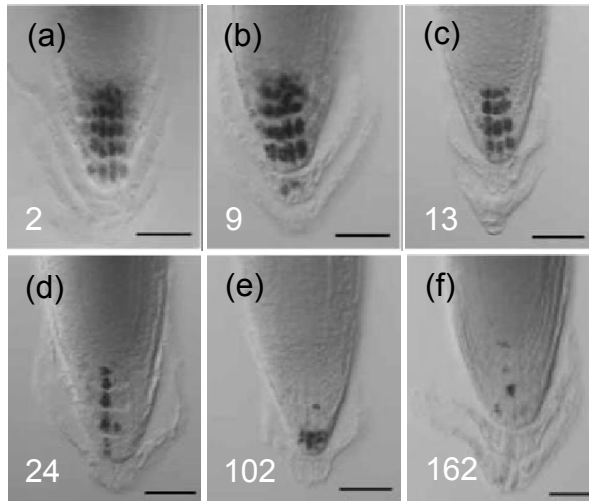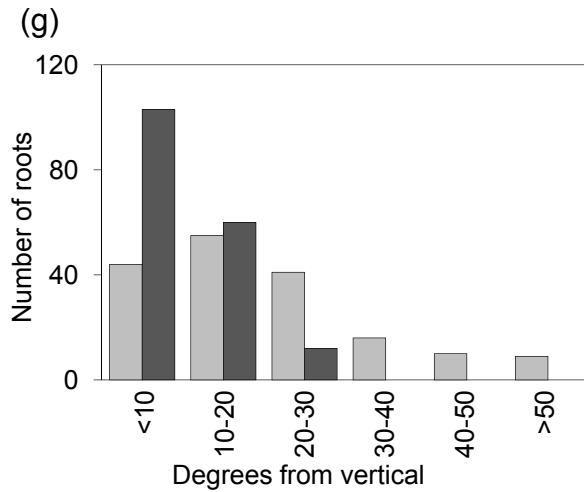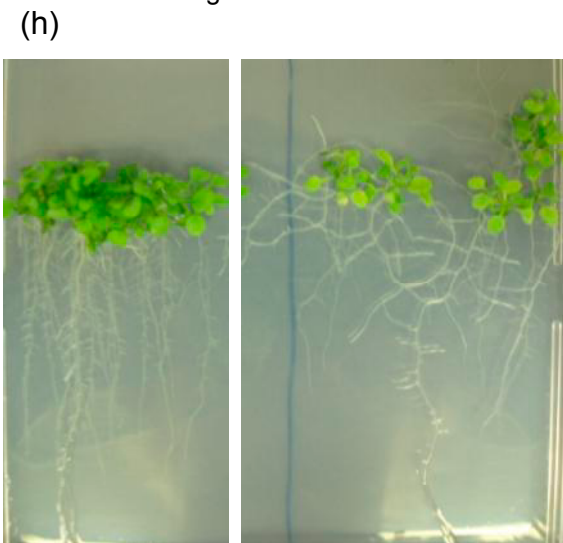

**Fig. S2** Growth of *ss4* roots. Seedlings were grown under sterile conditions in square polystyrene Petri dishes (100 x 15 mm) on 0.7% (w/v) agar containing the nutrients described in Haughn and Somerville (1986) with 1% (w/v) sucrose added. Seeds were surface-sterilised and sown on the agar medium in horizontal rows. After three days in darkness at 4 C, plates were placed vertically at 22 C under continuous illumination. (a) – (f) Iodine-stained root tips of wild-type (a) and *ss4* mutant (b) - (f) grown on vertical agar plates in 16 h light, 8 h dark, at four days (a), (c), (e), or eight days (b), (d), (f) after germination. Numbers indicate the deviation (degrees) of the apical 2.5 mm from the vertical. Bars represent 50 μm. (g) Deviation from the vertical of the apical 2.5 mm of wild-type (dark gray) and *ss4* (light gray) roots four days after germination. Measurements were on 175 plants of each genotype. (h) Seedlings of wild-type (left) and *ss4* mutant (right) plants eight days after germination on vertical agar plates.

(a)

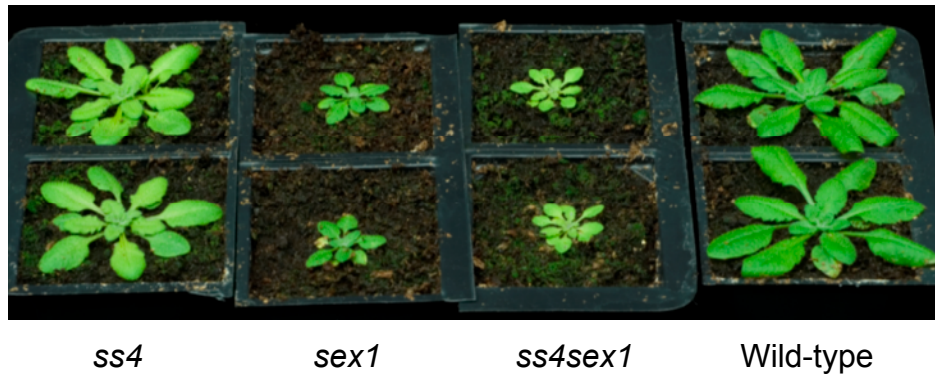

(b)

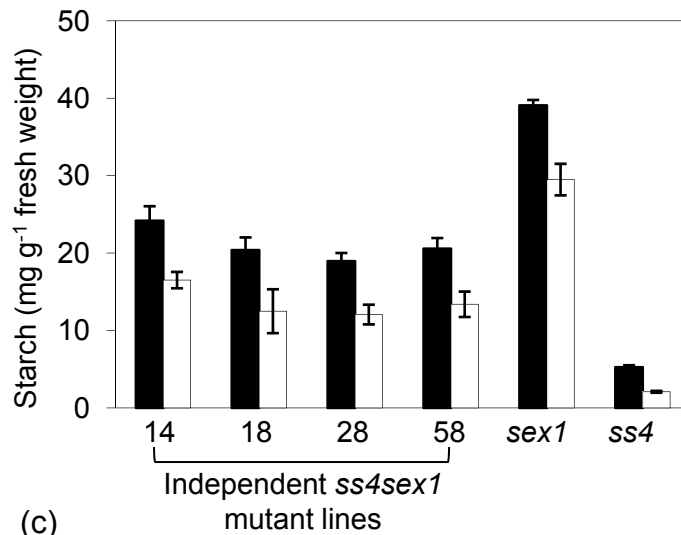

(c)

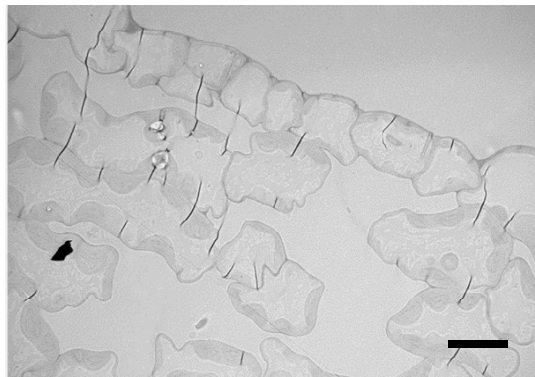

**Fig. S3** Phenotypes of *ss4sex1* mutants. (a) Appearance of wild-type, *ss4*, *sex1* and *ss4sex1* plants. Plants were of the same age and grown in the same conditions (12 h light, 12 h dark). (b) Starch contents of *sex1* and *ss4* plants and plants of four independently-selected *ss4sex1* mutant lines, at the end of the day (black) and the end of the night (white). Values are means of measurements on five or six rosettes. Error bars are SE. (c) Transmission electron micrograph of a young leaf of *ss4sex1*. Bar represents 10  $\mu\text{m}$ .



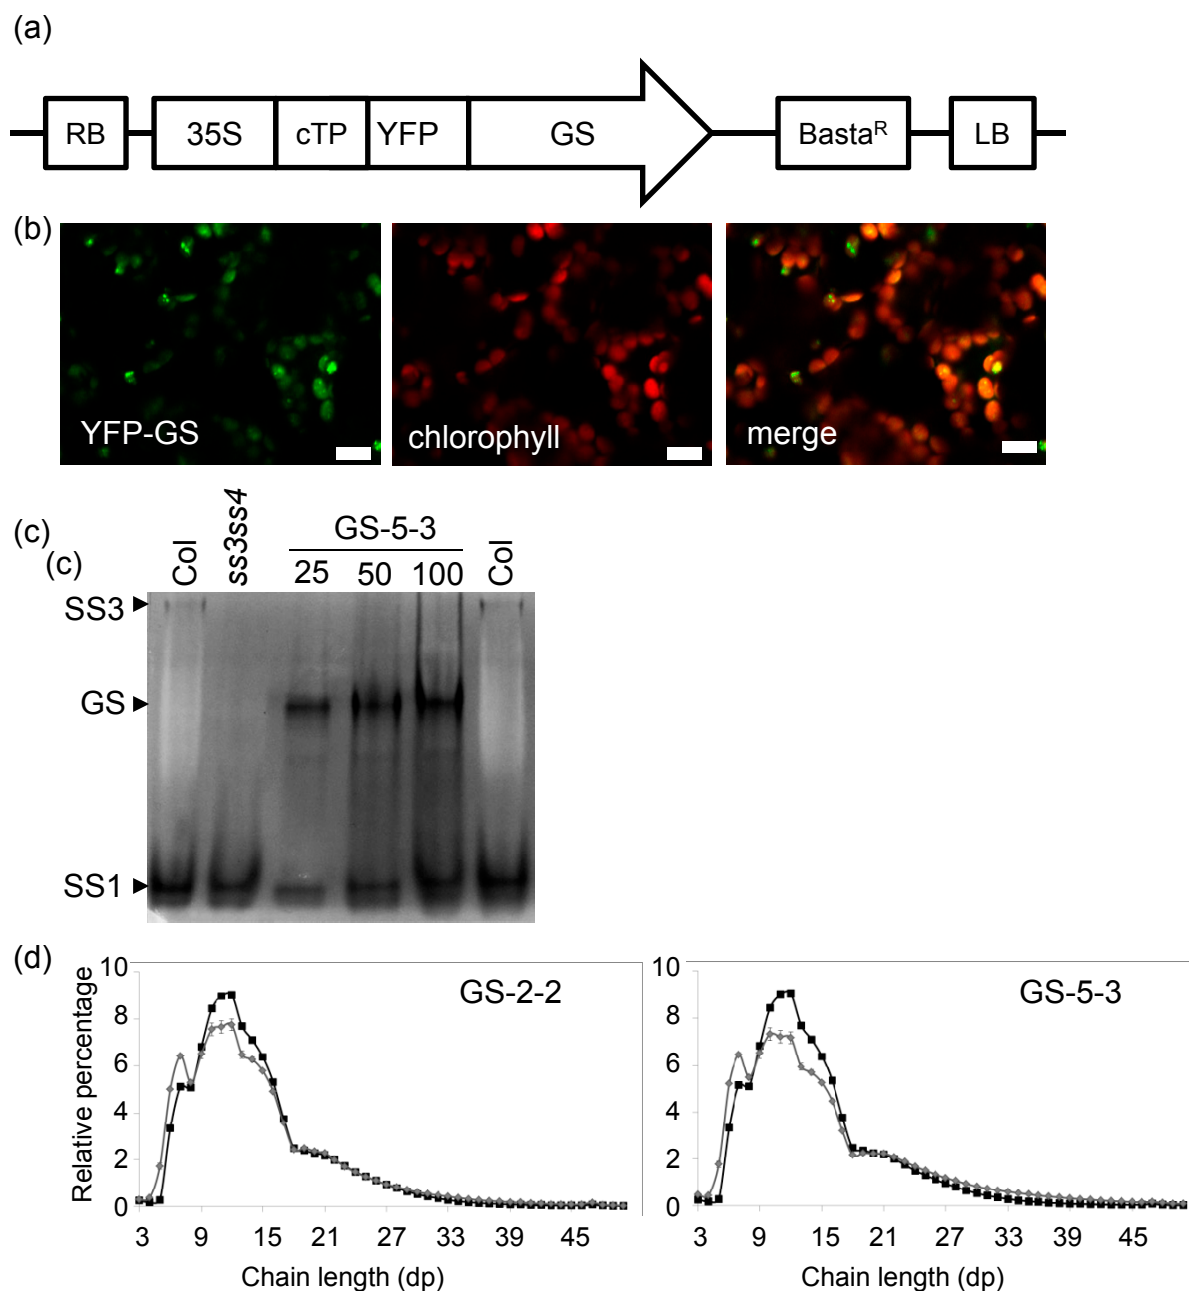

**Fig. S4** Expression of *Agrobacterium glgA* in *ss3ss4* mutants. (a) A construct for constitutive 35S-driven expression of GS fused to a chloroplast transit peptide (cTP and yellow fluorescent protein (YFP), was transformed into *ss3ss4* mutants. LB and RB: left and right T-DNA borders. Basta<sup>®</sup>: sequence encoding the BASTA resistant enzyme phosphinothricin acetyl transferase. (b) Localization of YFP-GS in transformed *ss3ss4* plants (line G-2-2). Confocal fluorescence micrographs showing YFP-GS (left), chlorophyll fluorescence (middle), and the merged images (right). (c) GS and endogenous starch synthase activities detected by non-denaturing PAGE. Soluble extracts of leaves were loaded onto native 7.5% polyacrylamide gels containing 0.3% (w/v) glycogen. For wild-type (Col) and *ss3ss4*, lanes contain material from 100  $\mu$ g fresh weight. The three lanes for the GS-expressing line contain material from 25, 50 and 100  $\mu$ g fresh weight. After electrophoresis and incubation in a medium containing 1 mM ADPG, activities were detected by iodine staining. GS and endogenous SS1 and SS3 activities are marked.

**Fig. S4** continued.

(d) Chain-length distribution of starch isolated from wild-type plants (black symbols) and *ss3ss4* lines expressing *Agrobacterium* GS (grey symbols). Left, GS-2-2. Right, GS-5-3. Starch was debranched with isoamylase and pullulanase and analysed by HPAEC-PAD. Peak areas were summed and the areas of individual peaks expressed as a percentage of the total. Values are means  $\pm$  SE of measurements on four (wild-type, GS-5-3) or three (GS-2-2) independent samples.

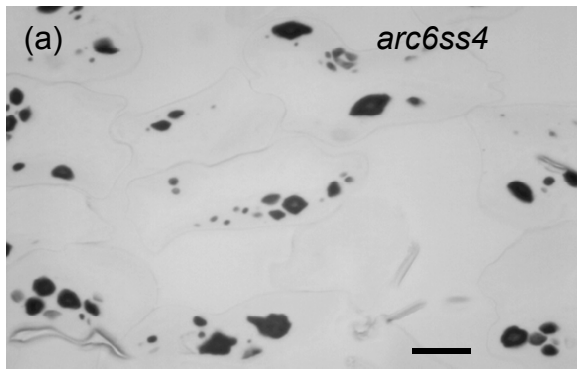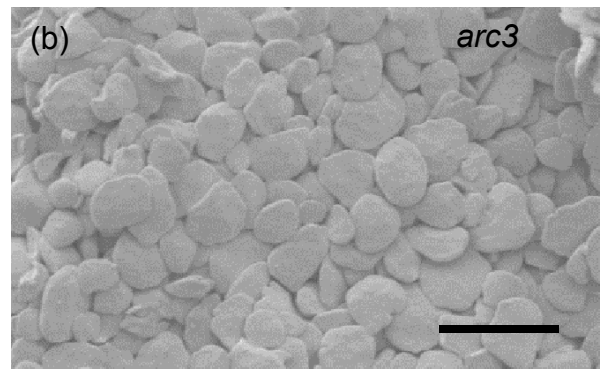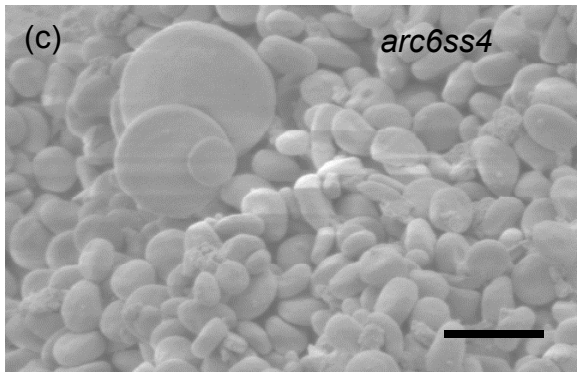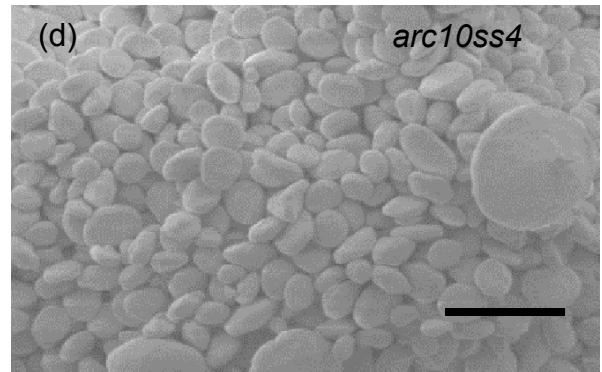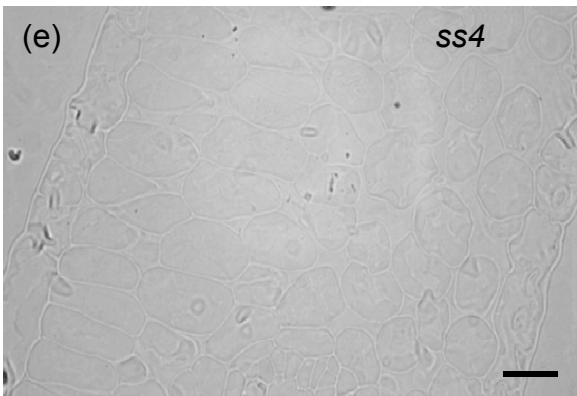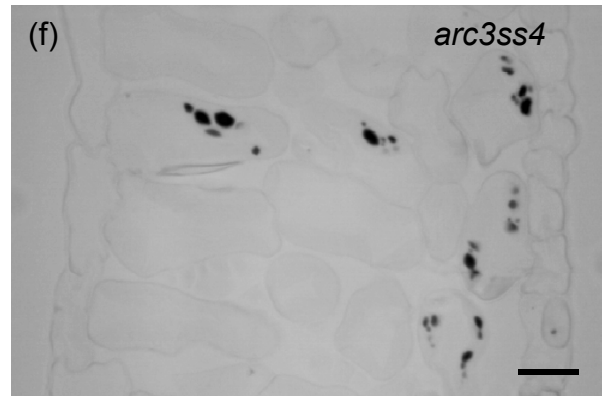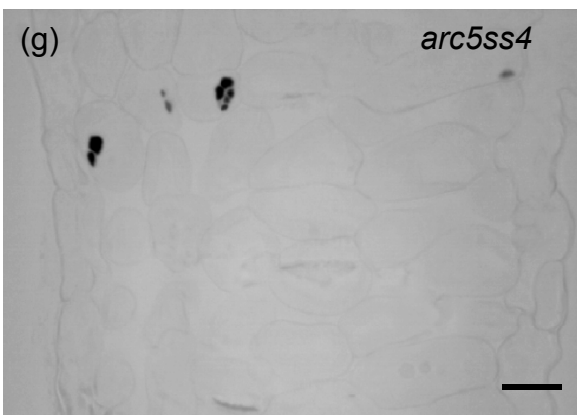

Figure S5

Figure S5 continued

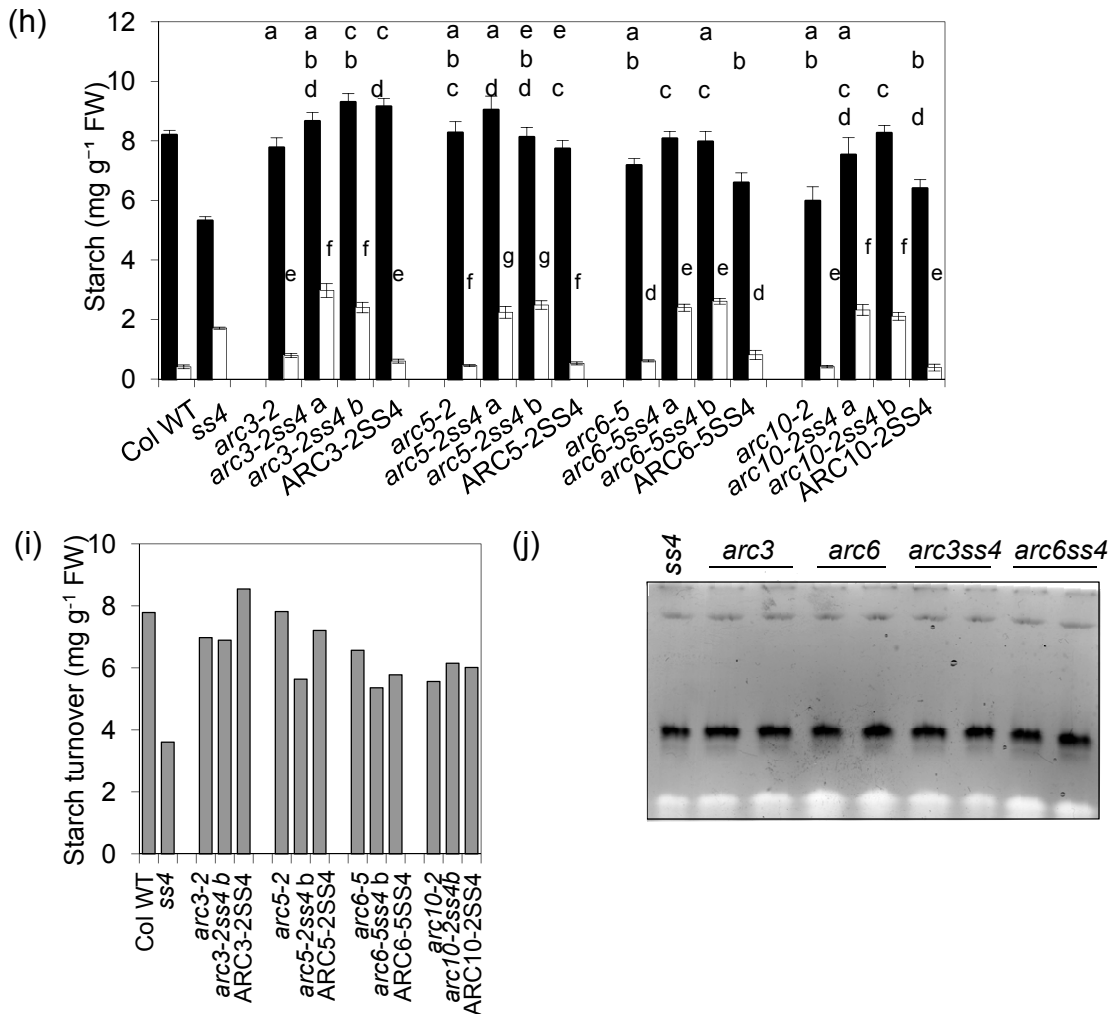

**Fig. S5** Starch granules and starch synthases in *arc x ss4* mutants. Light micrographs of leaf sections [(a), (e) – (g): iodine stained, bars represent 10  $\mu$ m] and scanning electron micrographs of starch granules from rosettes harvested at the end of the light period [(b) - (d): bars represent 5  $\mu$ m]. Note that starch granules are present in some chloroplasts of the double mutants but not the *ss4* mutant, and that granules of double mutants are more rounded than those of *arc3*, with some exceptionally large granules in double mutants. (a) Mature *arc6ss4* leaf, stained with iodine solution. Bar represents 10  $\mu$ m. (b) Starch granules of *arc3*. (c) Starch granules of *arc6ss4*. (d) Starch granules of *arc10ss4*. (e) Immature leaf of *ss4*. (f) Immature leaf of *arc3ss4*. (g) Immature leaf of *arc5ss4*. (h) Starch contents of leaves at the end of the day (black) and the end of the night (white) for wild-type, *ss4* and *arc* mutant plants, in *arc x ss4* mutants (two independently selected line for each genotype, designated a and b), and in out-segregating wild-type plants from *arc x ss4* crosses (e.g. *ARC3-2SS4*). Values are means of measurements on six to eight plants. Bars are SE. Values with the same letter are not statistically significantly different ( $p > 0.05$ , Student's t-test). (i) Daily starch turnover in genotypes shown in (h). Turnover is end-of-day minus end-of-night starch contents, calculated from (h). (j) Starch synthase activities detected by non-denaturing PAGE. Soluble extracts of leaves (equivalent fresh weight in each lane) were loaded onto native 7.5% polyacrylamide gels containing 0.3% (w/v) glycogen. For all genotypes except *ss4*, the two lanes contain extracts from separate plants. After electrophoresis and incubation in a medium containing 1 mM ADPG, activities were detected by iodine staining. Note that band pattern and intensity is essentially the same in all genotypes.

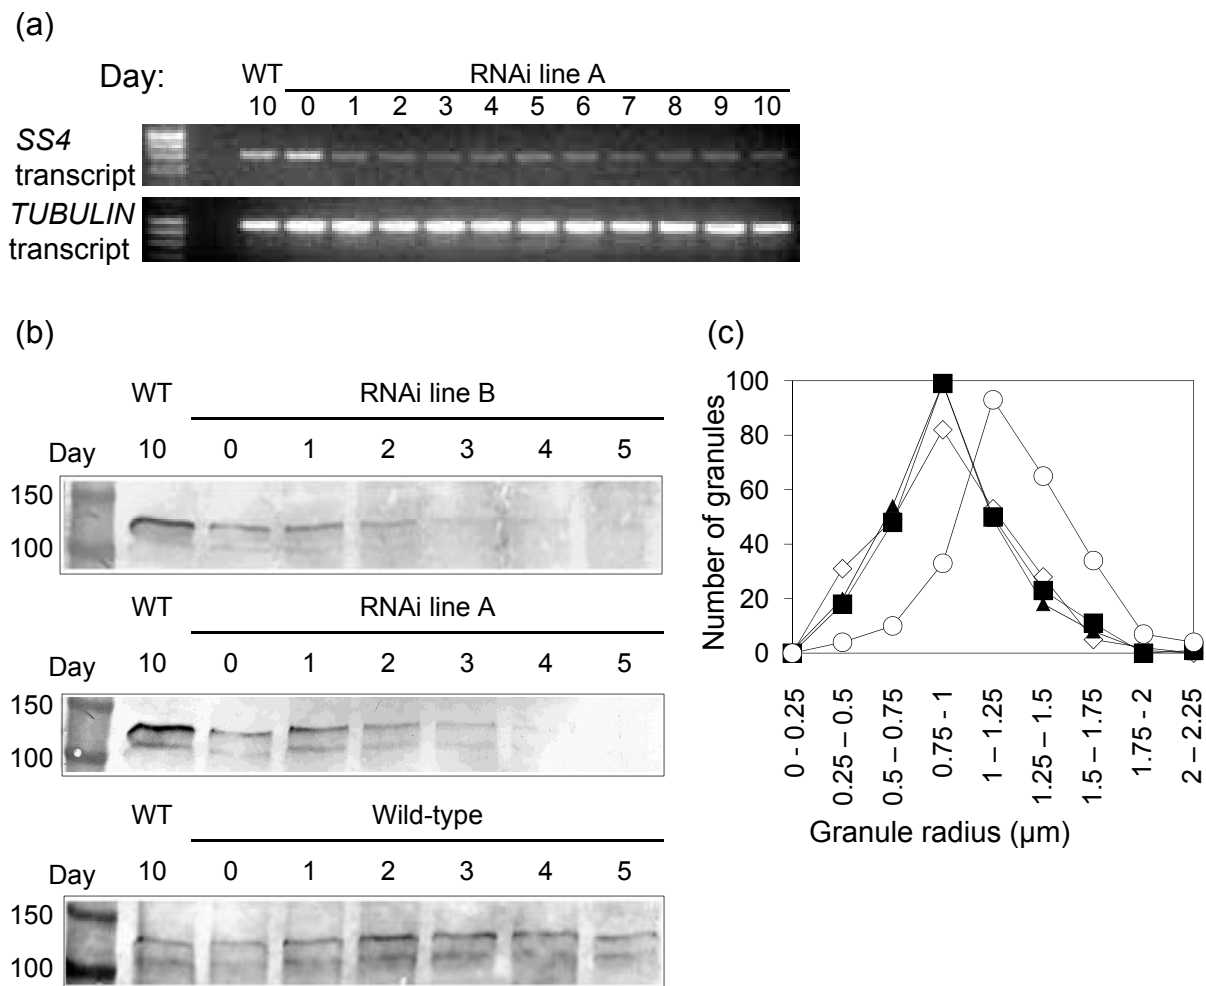

**Fig. S6** Effects of inducing RNAi targeted at the *SS4* gene. (a) Examples of agarose gels of PCR products for *SS4* and *TUBULIN* from RNAi line A, from which transcript levels shown in Figure 7(a) were derived. The first harvest (day 0) was immediately prior to dexamethasone (dex) application, 10 h into a 12-h light period. Dex was applied daily at this time point for the next ten days. Each harvest was immediately prior to dex treatment. Dex was also applied to wild-type (WT, not transformed) plants, which were harvested after 10 days of treatment. The left lane shows size markers of 1000, 800, 600 and 400 bp from top to bottom. (b) Representative immunoblots of SDS-polyacrylamide gels of extracts of wild-type, RNAi A and RNAi B plants, harvested at the indicated times after first application of dex. The positions of molecular mass markers are indicated at the right, in kDa. Each lane contains 40 µl extract from a separate plant. All extracts contained the same mg tissue per ml extraction medium. Experimental details are as in (a). Each harvest was immediately prior to dex treatment on days 1-5; wild-type (WT) plants were also harvested on day 10. Blots were probed with purified SS4 antibodies, raised against a unique 14-amino-acid peptide. These immunoblots are examples only. The protein levels displayed in Fig. 6(a) were derived from immunoblots of extracts of six separate plants per genotype for each time point. (c) Radii, measured from scanning electron micrographs, of starch granules extracted from wild-type (diamonds), RNAi line A (triangles), RNAi line B (squares) and *ss4* mutant (circles) rosettes at the end of the light period. Values are means of measurements on 250 granules for each genotype.

ATGACGACGAAGCTATCGAGCTTCTGTTTCTTAACCCATGGATTAGCAGGAATCTCCTGCGAGAGAGAACATGGAAGTTCTCGT  
CGATTTTTCTATCTCCCTTCTCGTCGATTAGTTTCTACTTCGTGTAAGATGCGACAACAACGTGGTTTCGACTCTAGTAAAAGACA  
AGAGGTCAAGAAAGGCTCCCCTAAACCGATCCTATCTATAAATTCAGGTCTTCAGAGCAACAATGATGAGGAATCTGATCTGGA  
GAATGGTTCTGCGGACAGTGTCCCAGTCTTAAGTCAGATGCTGAAAAGGGTAGTAGTATTCATGGCAGCATAGATATGAATCA  
TGCTGATGAGAATCTTGA AAAAGAAAGATGATATACAAACA ACTGAAGT TACTCGGCGCAAGAGTAAACTGCAAAGAAGAAAGG  
GGAGAGTATTCATGCTACGATTGATATTGGACATGATGATGGGAAGAATTTAGATAATATTACTGTGCCTGAGGTTGCAAAAAGCT  
TTGTCCCTTAACAAAAGTGAAGGCGAGCAGATTTGAGATGGACAGTTTGGGGA ACTAATGACAATGATAAGAAGTGCAGAAAAA  
AATATTCTTCGGCTTGATGAAGCACGGGCCACTGCTCTTGACGACCTTAAACAAGATTCTTAGTGATAAGGAAGCGTTGCAGGGA  
GAAATCAATGTCTTGAAAATGAAATTGTCTGAGACTGATGAAAGGATTA AACTGCTGCTCAAGAGAAAAGCACATGTAGAGCTC  
TGGAAGAACAGTTAGAGAAGCTTCGTCATGAAATGATCTCCCCTATAGAAAAGTATGTTTACTGCTCTTAGCAAAGAGCT  
TGAAACATTGAAGCTGGAGAATCTATCTTTGAGAAACGATATAGAAATGCTTAAGTCAGAACTTGACAGTGTTAAAGATACCGGT  
GAACGTGTGGTTGTGTTGAAAAGGAGTGTCCGGTTTGAATCTTCTGTAAGGATTTGGAATCTAAGTTATCGGTTTCTCAG  
GAAGATGTCTCGCAGCTTTCTACTCTTAAATCGAATGCACTGATCTATGGGCGAAGGTAGAGACTCTACAGCTGTTGTTAGATA  
GAGCTACCAACAAGCAGAGCAAGCAGTTATAGTGTACAAACAGAACCAAGATCTAAGAAATAAGGTCGACAAAATTGAGGAAT  
CACTTAAAGAAGCCAACGTTTATAAAGAATCTTCAGAGAAAATTCAACAGTACAATGAGCTAATGCAACATAAGGTGACATTACT  
TGAGGAGCGGCTCGAAAAGTCTGATGCAGAGATATTCTCATATGTTGAGTTATATCAAGAATCGATAAAAAGAAATTCAGGAAACA  
CTTGAAAGTTTGAAGGAAGAAAGCAAGAAAAAATCAAGAGATGAACCGTTGATGATATGCCTTGGGATTATTGGAGTCGGTTA  
CTTTAACTGTTGATGGATGGCTGCTTGAAAAGAAAATAGCAAGCAACGATGCTGACTTACTGAGAGACATGGTATGGAAGAAA  
GATCGAAGAATTCATGATACCTATATTGACGTCAAAGATAAGAATGAACGTGATGCCATCTCTGCATTTCTCAAGCTTGTCTCAT  
CTCCAACAAGTTCAGGATTGTATGTCGTTACATTGCAGCTGAGATGGCACCTGTAGCTAAGGTGGGAGTTTGGGAGATGTTG  
TGGCAGGTCTTGGTAAGGCATTGCAAAGAAAAGGTCATCTGGTGGAGATTATTCTTCCCAAATATGACTGTATGCAGTATGATC  
GCGTGCGTACTTAAGGGCTTTGGATACTGTTGTGGAGTCATATTTGATGGGAAGTTATATAAAAACAAAATCT[GGATTGGCA  
CTGTTGAAGGTTACCTGTACATTTCAATTGAACCTCAACATCCAAGCAAATTTCTTCTGGAGAGGACAGTTTTATGGAGAGCAA  
GATGATTTGAGAGCTTCTCGTATTTAGCCGAGCTGCACTA GAGTTGTTCTTCTAGTCCG]CAAAAACCCGACATCATACT  
TGTCATGACTGGCAAACAGCTTTTGTGCGCCGCTGTATTGGGATCTGTATGCTCCAAAGGGATTAGATTCTGCAAGAATATGC  
TTTACATGTCATAATTTGAGTATCAAGGTACCGCGTCTGCTTCAGAATTGGGATCTTGGGGCTTGATGTTAACCAGTTAATA  
GACCAGACAGAATGCAGGATCACTCGTCTGGAGATAGAGTCAATCCTGTTAAGGGCGCTATAATTTTCTCAAACATTGTAACAA  
CCGTGTCCCCTACTTATGCACAAGAAGTTCGAACAGCTGAGGGAGGAAAAGGACTCCATTCAACACTCAATTTTCACTCCAAGA  
AATTCATTGGAATCCTCAACGGCATTGACACAGATTGATGGAATCCTGCCACCGACCCCTTCTCAAGGCTCAGTTCAACGCTA  
AAGATCTACAAGGGAAAAGAAGAAAACAAACACGCCCTTAGAAAGCAGCTTGGACTTTCTTACGCGGAGTCAAGACGGCCTTTG  
GTTGGTTGCATAACAAGATTAGTACCACAGAAAGGAGTTCATCTAATCAGACATGCCATATACAGAACATTAGAGTTAGGTGGAC  
AATTTGACTTCTTGGTTCTAGCCCGTTCCACATATTCAGAGGGAATTTGAAGGTATTGAACAACAGTTTAAAAGCCATGATCA  
TGTCCGGTTGTTACTGAAGTACGATGAAGCTCTGTCTCATACGATTACGCAGCCTCCGATTTGTTTCATCATTCCGTCAATTTT  
GAGCCTTGTGGACTTACACAGATGATCGCTATGAGATATGGCTCCATTCCAATTGCGCGAAAACACTGGAGGCTTAAATGACAGT  
GTCTTCGACATTGATGATGATACAATACCAACACAGTTTCAAATGGATTACATTTCAAACCGCGGACGAACAGGGTTTCAATT  
ATGCG[TTGGAGCGAGCATTAAATCACTACAAGAAAGATGAAGAGAAATGGATGAGACTTGTAGAGAAAAGTATGAGTATAG  
ATTTGAGCTGGGGATCATCAGCTACACAATCGAAGAACTCTACACGAGATCAGTGCCAGAGCAAGAGCTGTTCTTAATCG  
CACGTGAG]

**Fig. S7** *SS4* coding sequence showing regions targeted by RNAi. Primer regions are highlighted in red and the rest of the targeted sequence in blue. The first sequence is the target of the RNAi in line A; the second is the target of the RNA in line B (see Figs 6, S6).

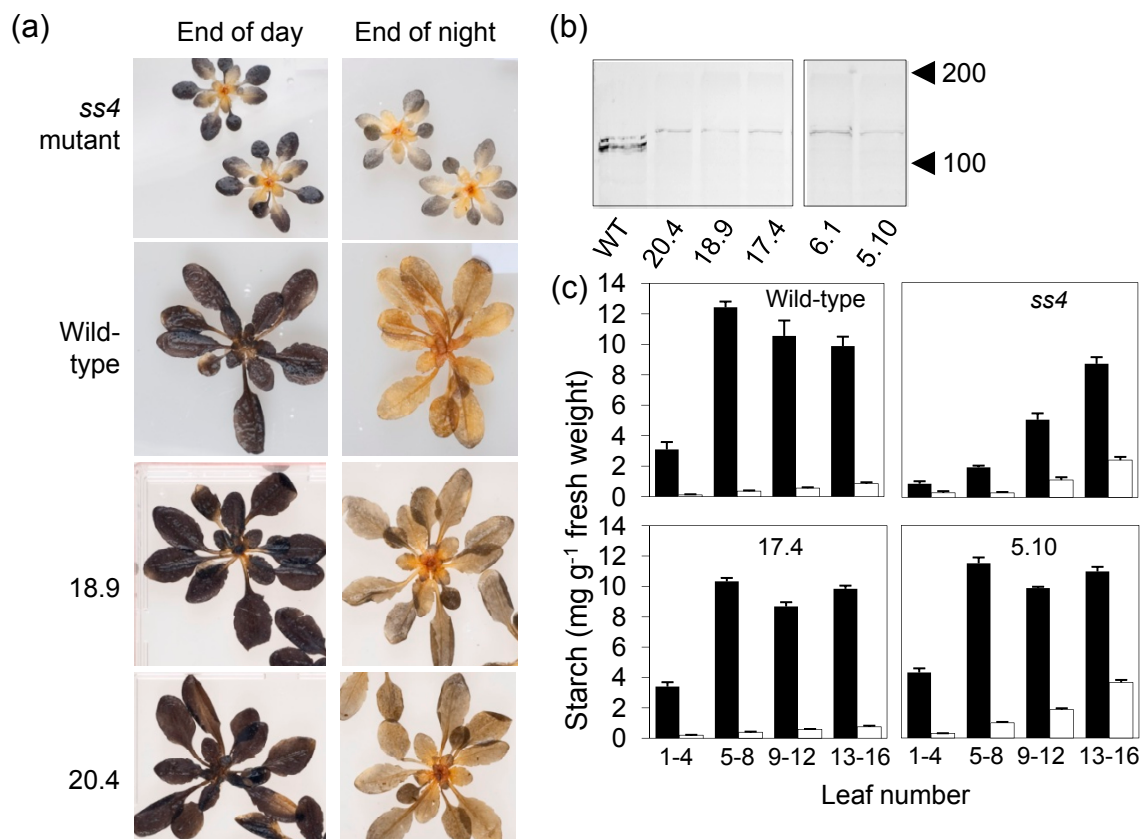

**Fig. S8** Transgenic *ss4* plants expressing SS4. (a) Starch contents of leaves of two *ss4* mutant lines expressing GFP-tagged SS4, at the end of the day (black) and the end of the night (white). Leaf one is the youngest and leaf 16 the oldest leaf. Values are means of measurements on four plants. Bars are SE. Note that the pattern of leaf starch content with respect to leaf age is similar to that of wild-type plants rather than *ss4* plants (compare with Fig. 2b, c). (b) Immunoblot of an SDS-polyacrylamide gel of extracts of rosettes of a wild-type plant and five lines of *ss4* plants expressing GFP-tagged SS4. The positions of molecular mass markers are indicated at the right, in kDa. Each lane contains 60  $\mu$ l extract from a separate plant. All lanes are from the same gel, and blots were developed together and for the same length of time. All extracts contained the same mg tissue per ml extraction medium. The blot was probed with purified SS4 antibodies, raised against a unique 14-amino-acid peptide. SS4 appears as two bands in wild-type extracts (see Fig. S1a and Roldán *et al.*, 2007). In the transgenic lines SS4 has reduced mobility because of its GFP tag (~30 kDa). No band is present at this position in immunoblots of extracts of *ss4* mutants (see Figs 7, S1a). (c) Starch contents of wild-type leaves, *ss4* mutant leaves, and leaves of two lines of *ss4* plants expressing GFP-tagged SS4 at the end of the day (black) and the end of the night (white). Leaf one is the youngest and leaf 16 the oldest leaf. Values are means of measurements on four plants. Error bars are SE.

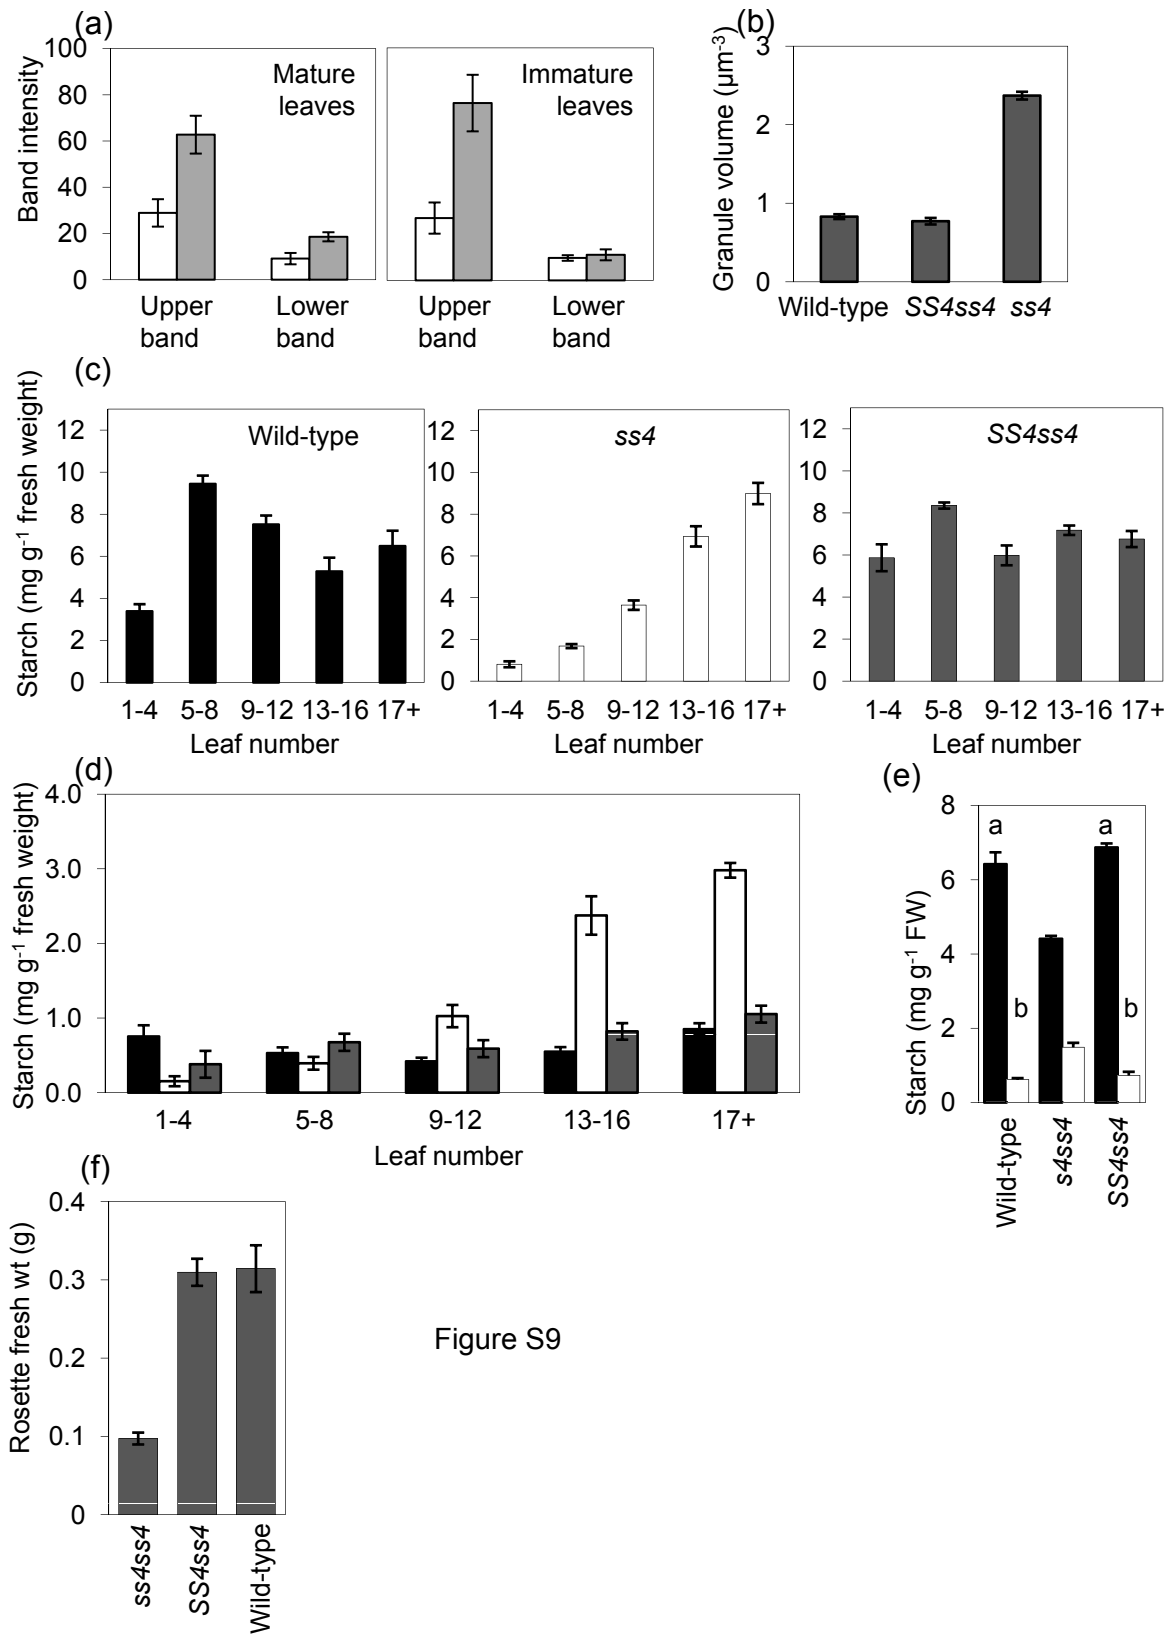

Figure S9



**Fig. S9** Further characterization of heterozygous (*SS4ss4*) plants. (a) Quantification of SS4 upper and lower band intensities from immunoblots as shown in Fig. 7, for extracts of mature leaves and immature leaves. Values (arbitrary units) are means of measurements for three independent heterozygous (white) or wild-type (grey) plants. Error bars are SE. (b) Volumes of granules extracted from wild-type, *SS4ss4* and mutant plants at the end of the day. Radii of between 319 and 2270 granules were measured per genotype, from SEM images, and volumes were calculated using the equations described in Crumpton-Taylor *et al.* (2012). Error bars are SE. (c) Starch contents of leaves of wild-type, *ss4* and *SS4ss4* plants at the end of the day. Leaf one is the youngest and leaf 16 the oldest leaf. Values are means of measurements on at least six rosettes. Error bars are SE. (d) Starch contents of leaves of wild-type (black), *ss4* (white) and *SS4ss4* (grey) plants at the end of the night. Leaf one is the youngest and leaf 16 the oldest leaf. Values are means of measurements on at least six rosettes. Error bars are SE. (e) Starch contents of whole rosettes at the end of the day (black) and the end of the night (white). Values are means of measurements on six rosettes. Error bars are SE. Values with the same letter are not statistically significantly different ( $p > 0.05$ , Student's t-test). (f) Fresh weights of rosettes 25 d after germination. Values are means of measurements on 15 (*ss4*), 18 (wild-type) or 45 (heterozygote) rosettes. Error bars are SE.
